# Supplementary material for: Role of community health workers in type 2 diabetes mellitus self-management: A scoping review
Source: PLOS journal article supplement (doi:10.1371/journal.pone.0198424), 2018-06-01
Supplement: S1 (10.1371/journal.pone.0198424.s001) [file journal.pone.0198424.s001]

# S1 Appendix

| Short Title    | Title                                                                                                                                                                                    | Aim                                                                                                                                                                                                                            | Study design                                   | Target Population                                     | Theoretical Framework                                           | Study duration | Training duration                                                                                                | Follow up training |
|----------------|------------------------------------------------------------------------------------------------------------------------------------------------------------------------------------------|--------------------------------------------------------------------------------------------------------------------------------------------------------------------------------------------------------------------------------|------------------------------------------------|-------------------------------------------------------|-----------------------------------------------------------------|----------------|------------------------------------------------------------------------------------------------------------------|--------------------|
| Brown (2002)   | Culturally competent diabetes self-management education for Mexican Americans: the Starr County border health initiative.                                                                | To determine the effects of a culturally competent diabetes self-management intervention in Mexican Americans with type 2 diabetes.                                                                                            | • RCT                                          | • Hispanic Americans<br><i>Mexican Americans</i>      |                                                                 | • 12 months    | • Not stated                                                                                                     | • not stated       |
| Gary (2003)    | Randomized controlled trial of the effects of nurse case manager and community health worker interventions on risk factors for diabetes-related complications in urban African Americans | To determine the effects of nurse case manager and community health worker interventions on risk factors for diabetes-related complications in urban African Americans                                                         | • RCT                                          | • African Americans<br><i>urban African Americans</i> | • Eco-behavioural/ Ecological Action Model<br>• Learning Theory | • 24 months    |                                                                                                                  | • not stated       |
| Higgins (2003) | The Promotora Telemedicine Project : Combining Technology and Cultural Sensitivity to Improve Diabetes Care in a Medically Underserved Community                                         | to test the hypothesis that new technology can be combined with culturally sensitive programs to improve access to high-quality care and to reduce the cost of diabetes care                                                   | • Quasi-experimental pre-test, post test study | • Hispanics and African Americans                     | • Not stated                                                    | • Not stated   | • Not stated                                                                                                     | • None provided    |
| Gary (2004)    | A randomized controlled trial of the effects of nurse case manager and community health worker team interventions in urban African-Americans with type 2 diabetes                        | to determine the effectiveness and cost-effectiveness of primary care and community-oriented interventions in managing HbA1c, blood pressure, and lipids, and reducing hospitalizations and emergency room visits over 2 years | • RCT                                          | • African Americans<br><i>urban African Americans</i> | <i>Precede–Proceed model</i>                                    | • 24 months    | • >1 month<br><i>6 weeks</i>                                                                                     |                    |
| Sul (2004)     | The Involvement of Lay Educators in the Diabetic Control of Type 2 Diabetic Patients                                                                                                     | to assess the effectiveness of introducing lay health educators into the community to improve diabetic control in Type 2 diabetic patients                                                                                     | • RCT                                          | • Asians<br><i>Malaysian</i>                          | • Not stated                                                    | • 6 months     | • <5 hours                                                                                                       | • not stated       |
| Two (2005)     | Racial and Ethnic Approaches to Community Health (REACH) Detroit partnership: improving diabetes-related outcomes among African American and Latino adults.                              | to determine the effects of a community-based, culturally tailored diabetes lifestyle intervention on risk factors for diabetes complications among African Americans and Latinos with type 2 diabetes                         | • Quasi-experimental pre-test, post test study | • Hispanics and African Americans                     | • Cognitive Theory                                              | • Not stated   | • >1 month<br><i>FHA trained for 10 weeks on FHA training programme, also on patient empowerment approaches.</i> |                    |

|                    |                                                                                                                                   |                                                                                                                                                                                                                                                                    |                                     |                                                  |                                                            |                                         |                                                                                                                     |                                                                   |
|--------------------|-----------------------------------------------------------------------------------------------------------------------------------|--------------------------------------------------------------------------------------------------------------------------------------------------------------------------------------------------------------------------------------------------------------------|-------------------------------------|--------------------------------------------------|------------------------------------------------------------|-----------------------------------------|---------------------------------------------------------------------------------------------------------------------|-------------------------------------------------------------------|
| Ingram (2007)      | The impact of promotoras on social support and glycemic control among members of a farmworker community on the US-Mexico border.  | to describe the effect of a promotora-driven intervention to build social support as a means to affect self-management behaviors and clinical outcomes in a farmworker community on the US-Mexico border                                                           | • 1-group pre-test-post-test design | • Hispanic Americans<br><i>Mexican Americans</i> | • Unclear                                                  | • 12 months                             | • Not stated                                                                                                        | • not stated                                                      |
| Lujan (2007)       | Promotora diabetes intervention for Mexican Americans.                                                                            | to determine the effectiveness of an intervention led by promotoras (community lay workers) on the glycemic control, diabetes knowledge, and diabetes health beliefs of Mexican Americans with type 2 diabetes                                                     | • RCT                               | • Hispanic Americans<br><i>Mexican Americans</i> | • Community-oriented model<br><i>Community empowerment</i> | • 6 months                              | <i>60 hour training on diabetes self-management</i>                                                                 | • None provided                                                   |
| Hill-Briggs (2007) | Training community health workers as diabetes educators for urban African Americans: value added using participatory methods      | To describe procedures used to recruit, train, and evaluate CHWs in Project Sugar 2, a randomized controlled trial of a nurse case manager and CHW team intervention designed to improve diabetes care and control in urban African Americans with type 2 diabetes | • Not stated                        | • African Americans                              |                                                            | • Not stated                            | <i>6 phases, &gt;240 hours of training</i>                                                                          | • not stated                                                      |
| Thompson (2007)    | Advancing diabetes self-management in the Mexican American population: a community health worker model in a primary care setting. | to pilot test the effectiveness of health promoters trained in the transtheoretical model of change to provide diabetes management education and support to Mexican Americans in a primary care setting                                                            | • 1-group pre-test-post-test design | • Hispanic Americans<br><i>Mexican Americans</i> | <i>transtheoretical model of change</i>                    | • 12 months                             | • >1 month<br><i>10 sessions of general training and 30 hours of diabetes management and transtheoretical model</i> | <i>biweekly meetings provided ongoing instruction and support</i> |
| Davis (2007)       | Teaching How, Not What: The Contributions of Community Health Workers to Diabetes Self-Management                                 | to describe ways in which community health workers (CHWs) are used in various clinic and community settings to support diabetes self-management                                                                                                                    | • Qualitative review                | • Hispanic Americans                             | • Not stated                                               | • Not stated<br>• Not applicable        | • Not stated                                                                                                        | • not stated                                                      |
| Liebman (2007)     | Establishing diabetes self-management in a community health center serving low-income Latinos.                                    | to describe the implementation of the chronic care model for Latinos with diabetes                                                                                                                                                                                 | • 1-group pre-test-post-test design | • Hispanic Americans                             | • Not stated                                               | • More than 24 months                   | • Not stated                                                                                                        | • not stated                                                      |
| Vincent (2007)     | A feasibility study of a culturally tailored diabetes intervention for Mexican Americans.                                         | to test the feasibility and examine the effects of a culturally tailored intervention for African American men with type 2 diabetes on outcomes of self-management                                                                                                 | • 1-group pre-test-post-test design |                                                  |                                                            | • Less than 6 months<br><i>3 months</i> |                                                                                                                     |                                                                   |

|                  |                                                                                                                                                         |                                                                                                                                                                                               |                                                |                                                  |                                                  |              |                                                                                                    |                                                                                               |
|------------------|---------------------------------------------------------------------------------------------------------------------------------------------------------|-----------------------------------------------------------------------------------------------------------------------------------------------------------------------------------------------|------------------------------------------------|--------------------------------------------------|--------------------------------------------------|--------------|----------------------------------------------------------------------------------------------------|-----------------------------------------------------------------------------------------------|
| Culica (2007)    | CoDE: Community Diabetes Education for uninsured Mexican Americans.                                                                                     | To describe the structure, patient acceptance, and costs of a one-to-one educational model delivered by a community health worker in a community clinic serving the uninsured                 | • Quasi-experimental pre-test, post test study | • Hispanic Americans<br><i>Mexican Americans</i> | • Not stated                                     | • 12 months  | <i>27 hours of training provided by Certified Diabetic educator, dietitian and Endocrinologist</i> |                                                                                               |
| Beckham (2008)   | Diabetes management: utilizing community health workers in a Hawaiian/Samoan population                                                                 | To examine the effectiveness of CHWs on diabetes management among a population with primarily Native Hawaiian and Samoan ethnic minority participants with HbA1c greater than 10%             | • Quasi-experimental pre-test, post test study | • American Samoa                                 | • Not stated                                     | • 12 months  | • >1 month<br><i>6 months</i>                                                                      | <i>Weekly and then monthly training for the duration of the project.</i>                      |
| Sixta (2008)     | Texas-Mexico Border Intervention by Promotores for Patients With Type 2 Diabetes                                                                        | to evaluate the impact of a promotores-led diabetes self-management program by comparing the outcomes (knowledge, beliefs, and HbA1c level) of Mexican American patients with type 2 diabetes | • RCT                                          | • Hispanic Americans<br><i>Mexican Americans</i> |                                                  | • 6 months   | • Not stated                                                                                       | • not stated                                                                                  |
| Liebman (2008)   | Quality Improvement in Diabetes Care Using Community Health Workers                                                                                     | to improve diabetes care among limited English-proficient (LEP) Latino patients                                                                                                               | • Quasi-experimental pre-test, post test study | • Hispanic Americans<br><i>Mostly hispanics</i>  | • Unclear                                        | • Unclear    | • 8 days - 1 month                                                                                 | • not stated                                                                                  |
| McElmurry (2009) | Implementation, outcomes, and lessons learned from a collaborative primary health care program to improve diabetes care among urban Latino populations. | To evaluate the relative effectiveness of a CHW intervention among Hispanic persons with newly diagnosed type 2 diabetes, as compared with usual clinic practice                              | • Quasi-experimental pre-test, post test study | • Hispanic Americans<br><i>Urban latinos</i>     | • Not stated                                     | • Not stated | • Not stated                                                                                       | <i>several-month period of on-the-job-training and additional formal learning experiences</i> |
| Babamoto (2009)  | Improving Diabetes Care and Health Measures Among Hispanics Using Community Health Workers: Results From a Randomized Controlled Trial                  | To pilot test the efficacy of a culturally tailored diabetes self-management social support intervention for Mexican American adults with Type 2 diabetes (T2DM)                              | • RCT                                          | • Hispanic Americans                             | <i>transtheoretical (stages of change) model</i> | • 6 months   | <i>6 weeks training on Diabetes standards, self management startegies, health beliefs</i>          | • not stated                                                                                  |
| McEwen           | Type 2 diabetes self-management social support intervention at the U.S.-Mexico border.                                                                  | To improve self-management among patients with type 2 diabetes incorporating CHWs as members of a clinical team                                                                               | • 1-group pre-test-post-test design            | • Hispanic Americans<br><i>Mexican Americans</i> | • Not stated                                     | • 6 months   | • >1 month<br><i>8 weeks (24 hours)</i>                                                            | <i>Ongoing 1-hr monthly training</i>                                                          |

|                      |                                                                                                                                                                                         |                                                                                                                                                                                                                                                                                                                                                                                                                                                                   |                                                       |                                                                  |                                                             |                      |                           |              |
|----------------------|-----------------------------------------------------------------------------------------------------------------------------------------------------------------------------------------|-------------------------------------------------------------------------------------------------------------------------------------------------------------------------------------------------------------------------------------------------------------------------------------------------------------------------------------------------------------------------------------------------------------------------------------------------------------------|-------------------------------------------------------|------------------------------------------------------------------|-------------------------------------------------------------|----------------------|---------------------------|--------------|
| Otero-sabogal (2010) | Physician – community health worker partnering to support diabetes self- management in primary care                                                                                     | to explore the role of the promotora de salud (health promoter) who provided diabetes self-management education to Puerto Rican diabetics in her community                                                                                                                                                                                                                                                                                                        | • Quasi-experimental pre-test, post test study        | • Hispanic Americans<br><i>Low income latino</i>                 | • Not stated                                                | • 12 months          | • Not stated              | • not stated |
| Deitrick (2010)      | Understanding the Role of the Promotora in a Latino Diabetes Education Program                                                                                                          | To conduct a diabetes education program delivered by community health workers in community settings; and evaluate its effectiveness in improving glycemic control and self-management skills in Hispanic/Latinos with type 2 diabetes                                                                                                                                                                                                                             | • Qualitative review<br><i>focus group discussion</i> | • Hispanic Americans<br><i>Puerto ricans</i>                     | • Not stated                                                | • Not stated         |                           |              |
| Castillo (2010)      | Community-based Diabetes Education for Latinos The Diabetes Empowerment Education Program                                                                                               | To test the feasibility of implementing a group health education and intervention model to reduce the incidence of diabetes and obesity among African American men; (2) improve regular access to and utilization of health care services and community supportive resources to promote healthy lifestyles among African American men; and (3) build community networks and capacity for advocacy and addressing some of the health needs of African American men | • 1-group pre-test-post-test design                   | • Hispanic Americans                                             | <i>principles of adult education and empowerment theory</i> | • Less than 6 months | <i>20 hours of TOT</i>    |              |
| Treadwell (2010)     | Addressing obesity and diabetes among African American men: examination of a community-based model of prevention.                                                                       | To evaluate the effectiveness of a comprehensive program of CVD risk reduction delivered by nurse practitioner (NP)/community health worker (CHW) teams versus enhanced usual care                                                                                                                                                                                                                                                                                | • 1-group pre-test-post-test design                   | • African Americans                                              | • Not stated                                                | • Less than 6 months | • Not stated              | • not stated |
| Allen (2011)         | COACH trial: a randomized controlled trial of nurse practitioner/community health worker cardiovascular disease risk reduction in urban community health centers: rationale and design. | To test the effectiveness of a culturally tailored, behavioral theory-based community health worker intervention for improving glycemic control                                                                                                                                                                                                                                                                                                                   | • RCT                                                 | • Hispanics and African Americans<br><i>White and non-whites</i> | • Motivational Interviewing                                 | • 12 months          | • Not stated              |              |
| Spencer (2011)       | Effectiveness of a Community Health Worker Intervention Among African American and Latino Adults With Type 2 Diabetes: A Randomized Controlled Trial                                    | to determine the impact of Community Health Workers (promotoras de salud) on the self-management practices of people with diabetes on the U.S.-Mexico Border                                                                                                                                                                                                                                                                                                      | • RCT                                                 | • Hispanics and African Americans                                | <i>Empowerment Theory, socioecological model</i>            | • 6 months           | <i>More than 80 hours</i> | • not stated |

|               |                                                                                                                                      |                                                                                                                                                                                                                                      |                                                |                                                  |                                                              |             |                                                                                                                              |                                                                                                                                          |
|---------------|--------------------------------------------------------------------------------------------------------------------------------------|--------------------------------------------------------------------------------------------------------------------------------------------------------------------------------------------------------------------------------------|------------------------------------------------|--------------------------------------------------|--------------------------------------------------------------|-------------|------------------------------------------------------------------------------------------------------------------------------|------------------------------------------------------------------------------------------------------------------------------------------|
| Ryabov (2011) | The impact of community health workers on behavioral outcomes and glycemic control of diabetes patients on the U.S.-Mexico border    | To estimate the long-term cost-effectiveness of a lifestyle modification program led by community health workers (CHWs) for low-income Hispanic adults with type 2 diabetes.                                                         | • RCT                                          | • Hispanic Americans<br><i>Mexican Americans</i> | • Not stated                                                 | • 24 months | • Not stated                                                                                                                 | • not stated                                                                                                                             |
| Brown (2012)  | Cost-effectiveness analysis of a community health worker intervention for low-income Hispanic adults with diabetes.                  | Examine the effectiveness of using community health workers (CHWs) to support nurse-led diabetes self-management education (DSME) with medically underserved clients                                                                 | • Quasi-experimental pre-test, post test study | • Hispanic Americans                             | • Not stated                                                 | • 18 months | • Not stated                                                                                                                 | • not stated                                                                                                                             |
| Kegley (2012) | Role of Community Health Workers in Improving Diabetes Outcomes                                                                      | CHW-led diabetes self-management education program targeting Hispanic patients                                                                                                                                                       | • 1-group pre-test-post-test design            | • Hispanics and African Americans                | • Not stated                                                 | • Unclear   | • Not stated<br><i>CHW trained but duration not stated</i>                                                                   | • not stated                                                                                                                             |
| Walton (2012) | Reducing Diabetes Disparities Through the Implementation of a Community Health Worker–Led Diabetes Self-Management Education Program | to deliver a culturally relevant diabetes education program to a Hispanic population at a migrant clinic                                                                                                                             | • 1-group pre-test-post-test design            | • Hispanic Americans                             | • Learning Theory<br><i>Adult learning Theory of knowles</i> | • 12 months | <i>160 hours of training asTexas certified CHW and another 50 hours training on Diabetes education and project protocol.</i> | <i>35 hours of continuing education delivered by certified diabetes educators, physicians, a dietician, and a CHW certified trainer.</i> |
| Valen (2012)  | An innovative approach to diabetes education for a hispanic population utilizing community health workers                            | to answer key implementation questions from our translation research with a primary care-based, nurse-community health worker (CHW) team intervention to support type 2 diabetes self-management                                     | • 1-group pre-test-post-test design            | • Hispanic Americans                             |                                                              | • Unclear   | • 2 - 7 days<br><i>12 hours of initial training</i>                                                                          | <i>16 hours of ongoing training in between the program</i>                                                                               |
| DePue         | Implementation of a culturally tailored diabetes intervention with community health workers in American Samoa.                       | to determine the impact of a culturally tailored diabetes education program led by a community health worker (CHW) on the HbA1c, blood pressure, body mass index (BMI) and lipid status of uninsured Mexican Americans with diabetes | • Cross-sectional observational study          | • American Samoa                                 | • Unclear                                                    | • 12 months | • 2 - 7 days<br><i>extensive training on diabetes</i>                                                                        | • not stated<br><i>new recruits training is by apprenticeship model</i>                                                                  |

|                     |                                                                                                                                                                                    |                                                                                                                                                                                                                                                                                                 |                                                                        |                                                            |                                               |              |                                                                                                              |                                         |
|---------------------|------------------------------------------------------------------------------------------------------------------------------------------------------------------------------------|-------------------------------------------------------------------------------------------------------------------------------------------------------------------------------------------------------------------------------------------------------------------------------------------------|------------------------------------------------------------------------|------------------------------------------------------------|-----------------------------------------------|--------------|--------------------------------------------------------------------------------------------------------------|-----------------------------------------|
| Prezio (2013)       | Community Diabetes Education (CoDE) for uninsured Mexican Americans: a randomized controlled trial of a culturally tailored diabetes education and management                      | to evaluate the effectiveness of a Community Health Worker (CHW)-led diabetes self-management education (DSME) program and to understand how CHWs and primary care providers (PCPs) work together to provide comprehensive diabetes care                                                        | • RCT                                                                  | • Hispanic Americans<br><i>uninsured Mexican Americans</i> | • Cognitive Theory                            | • 12 months  |                                                                                                              |                                         |
| Collinsworth (2013) | Effectiveness of a community health worker-led diabetes self-management education program and implications for CHW involvement in care coordination strategies.                    | To evaluate the effectiveness of a culturally adapted, primary care-based nurse–community health worker (CHW) team intervention to support diabetes self-management on diabetes control and other biologic measures                                                                             | • 1-group pre-test-post-test design<br><i>mixed method was applied</i> | • Hispanic Americans                                       | • Not stated                                  | • 12 months  | • Not stated                                                                                                 | • not stated                            |
| De Pue (2013)       | Nurse–Community HealthWorker Team Improves Diabetes Care in American Samoa                                                                                                         | To describe the application of CBPR and UCD principles to the development of iDecide/Decido, an interactive, tailored, web-based diabetes medication education and decision support tool delivered by community health workers (CHWs) to African American and Latino participants with diabetes | • RCT                                                                  | • American Samoa                                           | • Not stated                                  | • 12 months  | <i>Extensive training but duration not mentioned. Apprenticeship model of training used for new recruits</i> | • not stated                            |
| Henderson (2013)    | Community-based participatory research and user-centered design in a diabetes medication information and decision tool.                                                            | examines the outcomes of a pilot CHW programme to improve the management of hypertension and diabetes                                                                                                                                                                                           | • Quasi-experimental pre-test, post test study                         | • Hispanics and African Americans                          | • Not stated                                  | • Not stated |                                                                                                              |                                         |
| Ndou (2013)         | A rapid assessment of a community health worker pilot programme to improve the management of hypertension and diabetes in Emfuleni sub-district of Gauteng Province, South Africa. | evaluated the effectiveness of the Salud y Bienestar program to deliver diabetes education in the Hispanic population in the United States.                                                                                                                                                     | • Cross-sectional observational study                                  | • Africans<br><i>South Africans</i>                        |                                               | • Not stated | • >1 month<br><i>14 weeks of training on home based care provision, health promotion</i>                     | • None provided                         |
| Cruz (2013)         | The effectiveness of a community health program in improving diabetes knowledge in the Hispanic population: Salud y Bienestar (Health and Wellness)                                | To examine the impact of a successful 12 month behavioral intervention to improve diabetes control on healthcare utilization in American Samoa                                                                                                                                                  | • 1-group pre-test-post-test design                                    | • Hispanic Americans                                       | <i>Diabetes Empowerment Education Program</i> | • Not stated | • 2 - 7 days                                                                                                 | <i>Semi- annual refresher trainings</i> |

|                 |                                                                                                                                                                                                         |                                                                                                                                                                                                                             |                                                |                                |                                                                                     |             |                                                                       |                                                                                                                  |
|-----------------|---------------------------------------------------------------------------------------------------------------------------------------------------------------------------------------------------------|-----------------------------------------------------------------------------------------------------------------------------------------------------------------------------------------------------------------------------|------------------------------------------------|--------------------------------|-------------------------------------------------------------------------------------|-------------|-----------------------------------------------------------------------|------------------------------------------------------------------------------------------------------------------|
| Sarah (2013)    | Impact of a Diabetes Control and Management Intervention on Healthcare Utilization in American Samoa                                                                                                    | to present the training process and fidelity of study protocol implementation using a promotora model for community-based diabetes prevention.                                                                              | • RCT                                          | • American Samoa               | • Not stated                                                                        | • 12 months |                                                                       | • not stated                                                                                                     |
| Sosa (2013)     | Lessons Learned from Training of Promotores de Salud for Obesity and Diabetes Prevention                                                                                                                | To increase weight loss and glycaemic control using an innovative community health worker (CHW) delivered intervention program in African America women                                                                     | • Quasi-experimental pre-test, post test study | • Hispanic Americans           | • Not stated                                                                        | • Unclear   | <i>60 hours of training</i>                                           | • None provided                                                                                                  |
| Cummings (2013) | EMPOWER: a randomized trial using community health workers to deliver a lifestyle intervention program in African American women with Type 2 diabetes: design, rationale, and baseline characteristics. | to explore the impact and feasibility of a pilot Community Health Worker (CHW) intervention to improve diabetes management among Bangladeshi-American individuals with type 2 diabetes living in New York City              | • RCT                                          | • African Americans            | <i>Cognitive behavioural technique, small change model of behavioural change</i>    | • 12 months | <i>50hour community based training on self study, didactic DM mgt</i> | <i>ongoing supervision call by investigators assesses knowledge. No other formal follow up training reported</i> |
| Islam           | Evaluation of a community health worker pilot intervention to improve diabetes management in Bangladeshi immigrants with type 2 diabetes in New York City.                                              | To describe the feasibility of using a community-based participatory research (CBPR) approach to implement the Power to Prevent (P2P) diabetes prevention education curriculum in rural African American (AA) setting       | 1-group pre-test-post-test design              | • Asians<br><i>Bangladeshi</i> | • Not stated                                                                        | • 12 months | • Not stated                                                          | • not stated                                                                                                     |
| Cené            | Implementation of the power to prevent diabetes prevention educational curriculum into rural African American communities: a feasibility study.                                                         | to examine the impact of a 10-week lifestyle management program delivered by community-based paraprofessionals in improving clinical markers and dietary behaviors related to diabetes control in an underserved population | • 1-group pre-test-post-test design            | • African Americans            | <i>Maxwell's 5 M (Model, Mentor, Monitor, Motivate, and Multiply) training mode</i> | • 12 months | <i>provided but duration not stated</i>                               | • None provided                                                                                                  |

|                     |                                                                                                                                                                                        |                                                                                                                                                                                                                            |                                      |                                                                         |                                                                                                                                                         |                      |                                                                                                                                   |              |
|---------------------|----------------------------------------------------------------------------------------------------------------------------------------------------------------------------------------|----------------------------------------------------------------------------------------------------------------------------------------------------------------------------------------------------------------------------|--------------------------------------|-------------------------------------------------------------------------|---------------------------------------------------------------------------------------------------------------------------------------------------------|----------------------|-----------------------------------------------------------------------------------------------------------------------------------|--------------|
| Saxe-Custack (2013) | A Patient-Centered Approach Using Community- Based Paraprofessionals to Improve Self-Management of Type 2 Diabetes.                                                                    | To assess whether community health workers (CHWs) could improve glycemic control among Mexican Americans with diabetes                                                                                                     | • 1- group pre-test-post-test design | • Hispanics and African Americans<br><i>Mixed race including whites</i> | • Motivational Interviewing<br><i>Motivational interviewing techniques as well as adult learning techniques were integral components of the program</i> | • Less than 6 months | • 2 - 7 days<br><i>3 day training of CHW on motivational interviewing and adult learning</i>                                      |              |
| Rothschild (2014)   | Mexican American trial of community health workers: a randomized controlled trial of a community health worker intervention for Mexican Americans with type 2 diabetes mellitus.       | To evaluate whether a community health worker (CHW) intervention improved clinically relevant markers of diabetes care in adult Hispanics                                                                                  | • RCT                                | • Hispanic Americans<br><i>Mexican American</i>                         | • Cognitive Theory                                                                                                                                      | • 24 months          | <i>100 hours of training on diabetes, behavioral self-management support, and home visit</i>                                      | • not stated |
| Palmas (2014)       | Results of the northern Manhattan diabetes community outreach project: a randomized trial studying a community health worker intervention to improve diabetes care in Hispanic adults. | To compare a peer leader (PL) versus a community health worker (CHW) telephone outreach intervention in sustaining improvements in HbA1c over 12 months after a 6-month diabetes self-management education (DSME) program. | • RCT                                | • Hispanic Americans                                                    | <i>Small Steps, Big Rewards framework,</i>                                                                                                              | • 12 months          | • Not stated                                                                                                                      | • not stated |
| Tang (2014)         | Comparative Effectiveness of Peer Leaders and Community Health Workers in Diabetes Self-management Support: Results of a Randomized Controlled Trial                                   | To compare outcomes between community health worker use of a tailored, interactive, Web-based, tablet computer-delivered tool (iDecide) and use of print educational materials                                             | • RCT                                | • Hispanic Americans                                                    | <i>Behavioural modification strategies. Patient empowerment approach</i><br>• Motivational Interviewing                                                 | • 18 months          | <i>160 hours of community outreach training plus 80 h of diabetes education, home visit experiences, human subjects tutorial;</i> | • not stated |



|                        |                                                                                                                                                                                                   |                                                                                                                                                                                                               |                                   |                                        |                                                                                                                                     |                      |                                                                                 |                                                                                                                                                                                                           |
|------------------------|---------------------------------------------------------------------------------------------------------------------------------------------------------------------------------------------------|---------------------------------------------------------------------------------------------------------------------------------------------------------------------------------------------------------------|-----------------------------------|----------------------------------------|-------------------------------------------------------------------------------------------------------------------------------------|----------------------|---------------------------------------------------------------------------------|-----------------------------------------------------------------------------------------------------------------------------------------------------------------------------------------------------------|
| Heisler (2014)         | Comparison of Community Health Worker–Led Diabetes Medication Decision-Making Support for Low-Income Latino and African American Adults With Diabetes Using E-Health Tools Versus Print Materials | The Neighborhood Health Talker Program used community members trained as cultural health brokers to engage their communities in conversations about "living diabetes well."                                   | • RCT                             | Hispanics and African Americans        | • Motivational Interviewing<br><i>Motivational Interviewing-based communication approaches and diabetes self-management support</i> | • Less than 6 months | <i>0 hours of training on motivationa Intervieweing</i>                         | <i>4-8 hours of booster training annually</i>                                                                                                                                                             |
| Cadzow (2014)          | "Living well with diabetes": evaluation of a pilot program to promote diabetes prevention and self-management in a medically underserved community.                                               | To determine the effects of a culturally competent diabetes self-management intervention in Mexican Americans with type 2 diabetes.                                                                           | 1-group pre-test-post-test design | • African Americans                    |                                                                                                                                     | • 6 months           | • 2 - 7 days<br><i>1 week formal training on leadership, diabetes knowledge</i> | • None provided                                                                                                                                                                                           |
| Carrasquillo (2014)    | Rationale and design of the Miami Healthy Heart Initiative: a randomized controlled study of a community health worker intervention among Latino patients with poorly controlled diabetes.        |                                                                                                                                                                                                               | • RCT                             | • Hispanic Americans<br><i>Latinos</i> | • Community-oriented model                                                                                                          | • 12 months          | <i>75 hour training on various aspects of disease mgt.</i>                      | <i>Ongoing periodic CHW training on issues such as CHW skills, clinic and insurance navigation, cardiovascular disease and diabetes care, and human subjects occurred on average about every 2 months</i> |
| Pérez-Escamilla (2015) | Impact of a community health workers-led structured program on blood glucose control among Latinos with type 2 diabetes: The DIALBEST Trial                                                       | <i>To examine the impact of the Diabetes Among Latinos Best Practices Trial (DIALBEST), a community health worker (CHW)-led structured intervention for improving glycemic control among Latinos with T2D</i> | • RCT                             | • Hispanic Americans                   | <i>Problem solving theory and stages of change theory</i><br>• Motivational Interviewing                                            | • 18 months          | <i>65 h of core training. More than 25 h of supplemental training</i>           | • not stated                                                                                                                                                                                              |

|                  |                                                                                                                                                        |                                                                                                                                                                               |                                  |                                           |                    |             |                                                                                                                               |                                                                                                                             |
|------------------|--------------------------------------------------------------------------------------------------------------------------------------------------------|-------------------------------------------------------------------------------------------------------------------------------------------------------------------------------|----------------------------------|-------------------------------------------|--------------------|-------------|-------------------------------------------------------------------------------------------------------------------------------|-----------------------------------------------------------------------------------------------------------------------------|
| McDermott (2015) | Community health workers improve diabetes care in remote Australian Indigenous communities: results of a pragmatic cluster randomized controlled trial | <i>to evaluate the effectiveness of a community-based health-worker led case management approach to the care of Indigenous adults with poorly controlled type 2 diabetes</i>  | • RCT                            | • Aboriginal Australians                  | • Not stated       | • 18 months | • 8 days - 1 month<br>3 weeks of intensive training on diabetes and other chronic disease management                          | <i>two workshops where they underwent refresher training, including in Good Clinical Practice and reflective practice.</i>  |
| Wagner (2015)    | Community health workers assisting Latinos manage stress and diabetes (CALMS-D): rationale, intervention design, implementation, and process outcomes  | <i>to compare enhanced standard diabetes care with enhanced standard care plus community health worker (CHW) delivered stress management for Latinos with type 2 diabetes</i> | • RCT                            | • Hispanic Americans                      | • Cognitive Theory | • 12 months | • >1 month<br>"150 hours over 5 months. Including 45hours Diabetes training, Self-management and stress management trainings" | <i>Her ongoing training included review- ing and critiquing, with PIWagner, videotapes of her-self delivering DE and SM</i> |
| Schmidt (2015)   | Impact of a Community Health Worker–Led Diabetes Education Program on Hospital and Emergency Department Utilization and Costs                          | <i>To assess the impact of a community health worker–led diabetes education program (DEP) on hospital utilization trends and to evaluate the return on investment</i>         | • Retro-prospective cohort study | • Hispanic Americans<br>Mexican Americans | • Not stated       | • 12 months | • Not stated                                                                                                                  | • not stated                                                                                                                |
